# Supplementary material for: Association of a Novel Protocol for Rapid Exclusion of Myocardial Infarction With Resource Use in a US Safety Net Hospital
Source: PubMed Central journal article supplement (PMC7177202; doi:10.1001/jamanetworkopen.2020.3359), 2020-04-22
Supplement: jamanetwopen-3-e203359-s001.pdf [file jamanetwopen-3-e203359-s001.pdf]

## Supplementary Online Content

Vigen R, Diercks DB, Hashim IA, Pandey A, Zhong L, et al. Association of a novel protocol for rapid exclusion of Myocardial Infarction with resource use in a US Safety Net Hospital. *JAMA Netw Open*. 2020;3(4):e203359. doi:10.1001/jamanetworkopen.2020.3359

**eFigure 1.** Resource Utilization and Safety Cohorts

**eFigure 2.** Parkland Hospital/UT Southwestern Protocol for Rapid Myocardial Infarction Rule-out Using the hs-cTnT Assay

**eFigure 3.** Median Monthly Dwell Times and Toponin to Disposition Times Pre and Post-Intervention

**eTable 1.** Odds of Admission vs Discharge and Observation vs Discharge

This supplementary material has been provided by the authors to give readers additional information about their work.

eFigure 1: Resource Utilization and Safety Cohorts

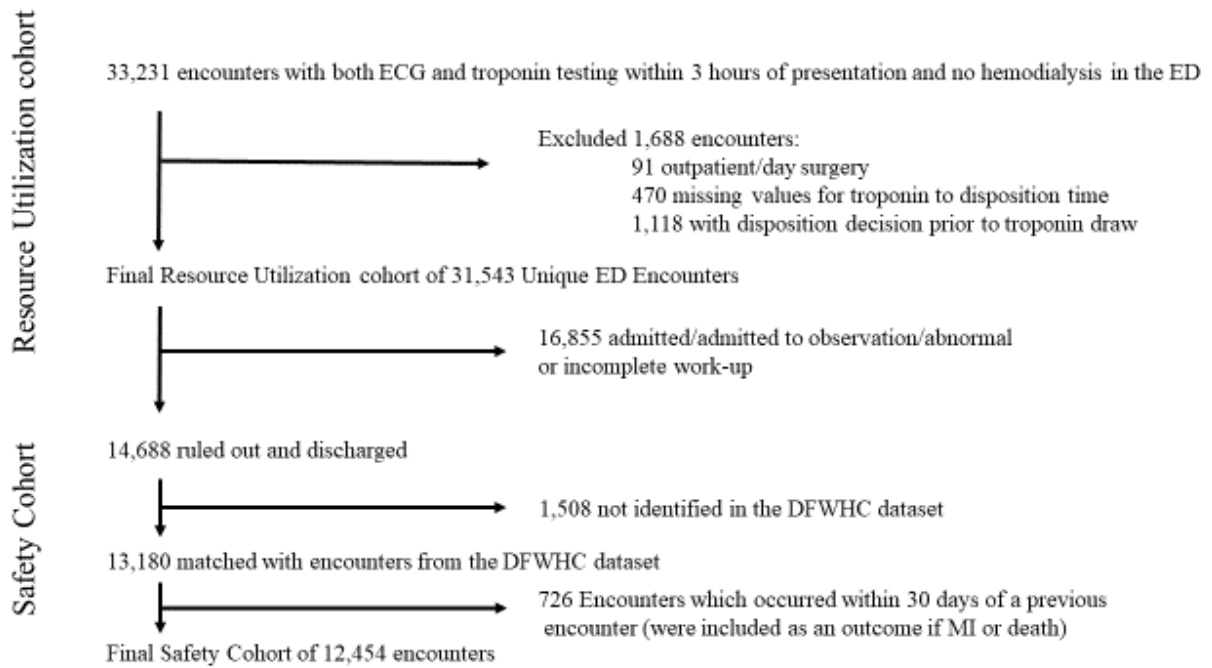

eFigure 2: Parkland Hospital/UT Southwestern protocol for rapid myocardial infarction rule-out using the hs-cTnT assay. CTA = Coronary CT Angiography

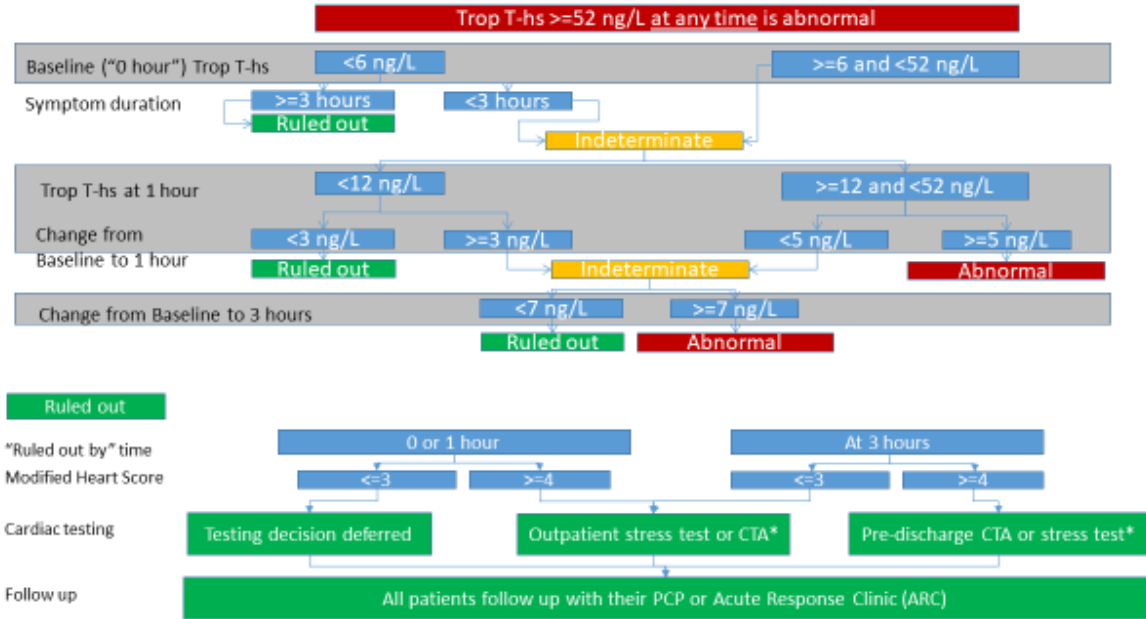

eFigure 3: Median Monthly Dwell Times and Troponin to disposition times pre and post-intervention

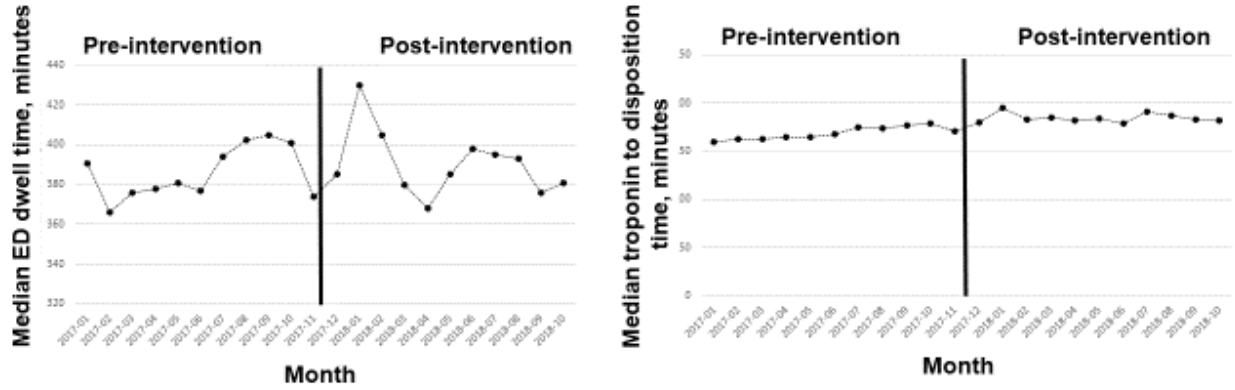

Table 3. Odds of Admission vs Discharge and Observation vs Discharge

|                                                                                                                    | Preintervention          |                            | Postintervention            |                            | P values<br>(interaction term)<br>for OR admit vs<br>discharge | P values<br>(interaction<br>term) for OR<br>observe vs<br>discharge |
|--------------------------------------------------------------------------------------------------------------------|--------------------------|----------------------------|-----------------------------|----------------------------|----------------------------------------------------------------|---------------------------------------------------------------------|
|                                                                                                                    | OR admit vs<br>discharge | OR observe vs<br>discharge | OR admit<br>vs<br>discharge | OR observe vs<br>discharge |                                                                |                                                                     |
| <b>Odds of admission vs discharge and observation vs discharged pre- and postintervention, unadjusted analysis</b> |                          |                            |                             |                            |                                                                |                                                                     |
| Total cohort (n = 31 543)                                                                                          | 0.98 (0.97-1)            | 0.99 (0.98-1)              | 0.97 (0.95-1)               | 1 (0.97-1.03)              | .27                                                            | .08                                                                 |
| Chest pain subcohort (n = 12 845)                                                                                  | 0.98 (0.96-1)            | 0.98 (0.97-1)              | 0.98 (0.93-1.03)            | 1.01 (0.97-1.06)           | .89                                                            | .06                                                                 |
| Subcohort with MI excluded (n = 25 611)                                                                            | 0.98 (0.97-0.99)         | 0.99 (0.98-1)              | 0.98 (0.94-1.01)            | 1.01 (0.97-1.04)           | .63                                                            | .09                                                                 |
| Chest pain and MI excluded subcohort (n = 10 917)                                                                  | 0.98 (0.96-1.01)         | 0.98 (0.97-1)              | 0.99 (0.93-1.06)            | 1.01 (0.97-1.06)           | .58                                                            | .045                                                                |
| <b>Odds of admission vs discharge and observation vs discharged pre- and post-intervention, adjusted analysis</b>  |                          |                            |                             |                            |                                                                |                                                                     |
| Total cohort (n = 25 082)                                                                                          | 0.98 (0.97-0.99)         | 0.99 (0.97-1)              | 0.98 (0.95-1.01)            | 1.01 (0.98-1.04)           | .91                                                            | .03                                                                 |
| Chest pain subcohort (n = 10 420)                                                                                  | 0.98 (0.96-1)            | 0.98 (0.96-1)              | 0.99 (0.94-1.04)            | 1.01 (0.97-1.06)           | .54                                                            | .02                                                                 |
| Subcohort with MI excluded (n = 20 505)                                                                            | 0.98 (0.96-0.99)         | 0.99 (0.98-1)              | 0.98 (0.95-1.02)            | 1.01 (0.98-1.05)           | .78                                                            | .03                                                                 |
| Chest pain and MI excluded subcohort (n = 8930)                                                                    | 0.98 (0.96-1)            | 0.98 (0.96-1)              | 1 (0.94-1.06)               | 1.02 (0.97-1.07)           | .35                                                            | .01                                                                 |

Abbreviation: IQR, interquartile range.
